# Supplementary material for: Association between serum 1,5-anhydroglucitol, dietary energy density and lifestyle factors in women with newly diagnosed type 2 diabetes
Source: Research Square preprint supplement (doi:10.21203/rs.3.rs-8012414/v1), 2025-12-22
Supplement: Supplementary file 1 [file 014ba3441261f15b1d52fd0d.docx]

**Table 1.** Distribution of general characteristics, biochemical, and lifestyle variables of participants

| **General characteristics, biochemical, and lifestyle variables** | **Patient Group**  **(n=44)** | **Control Group**  **(n=44)** | **p** |
| --- | --- | --- | --- |
| **±SS** | **±SS** |
| Age (years) (+SS) | 53,16±5,13 | 49,32±3,73 |  |
| Body Weight (kg) | 80,33±15,32 | 82,77±15,20 | 0,456 |
| Height (cm) | 156,82±6,66 | 159,01±5,35 | 0,092 |
| BMI (kg/m2) | 33,17±6,16 | 32,45±5,09 | 0,551 |
| Waist Circumference (cm) | 104,66±12,00 | 104,57±12,88 | 0,973 |
| Waist-to-Height Ratio | 0,67±0,08 | 0,66±0,08 | 0,518 |
| Waist-to-Height Ratio (cm) | 35,41±2,37 | 34,64±2,89 | 0,388 |
| Body Fat Percentage (%) | 40,36±5,73 | 40,49±6,31 | 0,920 |
| Body Water Percentage (%) | 43,82±3,70 | 44,28±4,39 | 0,595 |
| Fat-Free Mass (kg) | 44,62±5,02 | 46,08±4,73 | 0,162 |
| HbA1c (%) | 6,99±0,62 | 5,37±0,37 | **0,010*** |
| APG (mg/dL) | 134,44±30,24 | 88,82±8,54 | **0,010*** |
| Insulin (uIU/mL) | 13,57±11,84 | 8,86±4,71 | **0,050*** |
| Total Cholesterol (mg/dL) | 218,10±39,51 | 209,02±43,94 | 0,311 |
| HDL-C (mg/dL) | 49,90±11,74 | 55,27±11,92 | 0,220 |
| LDL-C (mg/dL) | 137,06±37,62 | 155,39±150,15 | 0,689 |
| Trigliserid (mg/dL) | 189,25±74,70 | 126,85±62,55 | **0,010*** |
| HOMA-IR | 4,31±3,62 | 1,86±1,11 | **0,010*** |
| C-peptide (mg/dL) | 3,61±1,85 | 2,30±0,86 | **0,010*** |
| 1,5-Anhydroglucitol (mcg /mL) | 5,03±1,42 | 13,05±4,96 | **0,010*** |
| Energy Expenditure from Physical Activity (kkal) | 1657,65±364,08 | 1630,67±355,93 | 0,726 |
| Physical Activity Level (PAL) | 1,24±0,12 | 1,23±0,09 | 0,583 |
| RMR (Kkal) | 1322,04±219,01 | 1319,11±264,06 | 0,955 |
| Sleep Duration (hours) | 480±74 | 480±81 | 0,979 |
| Total Stress Score | 20,61±9,13 | 20,45±7,02 | 0,927 |
| Circadian Rhythm Score | 53,50±8,25 | 51,00±7,50 | **0,050*** |
| * Significant at p<0,05; BMI: Body Mass Index; HbA1c: Glycated Hemoglobin; FPG: Fasting Plasma Glucose; HDL-C: High-Density Lipoprotein Cholesterol; LDL-C: Low-Density Lipoprotein Cholesterol; TC: Total Cholesterol HOMA-IR: Homeostasis Model Assessment of Insulin Resistance; RMR: Resting Metabolic Rate | | | |

Table 2. Comparison of energy and nutrient intake between patient and control groups

| **Energy and nutrient intake variables** | **Patient Group**  **(n=44)** | **Control Group**  **(n=44)** | **p** |
| --- | --- | --- | --- |
| **±SS** | **±SS** |
| Energy (kcal/day) | 2058,9±310,6 | 2103,9±390,6 | 0,770 |
| Protein (g/day) | 73,32±13,21 | 67,61±11,50 | **0,033*** |
| Protein (% energy) | 15±3 | 13±2 | **0,004*** |
| Fat (g/day) | 96,79±17,12 | 91,45±20,47 | 0,188 |
| Fat (% energy) | 42±6 | 39±6 | **0,003*** |
| Carbohydrate (g/day) | 217,76±54,51 | 244,80±62,65 | **0,049*** |
| Carbohydrate  (% energy) | 43±7 | 47±7 | **0,003*** |
| SFA (g/day) (%) | 13,76±2,47 | 13,27±2,4 | 0,377 |
| MFA (%) | 14,87±2,75 | 13,71±3,15 | 0,068 |
| PFA (%) | 10,95±3,41 | 9,53±2,54 | **0,036*** |
| Cholesterol (mg/day) | 317,54±136,15 | 360,48±171,65 | 0,305 |
| Omega-3 (g/day) | 2,04±0,88 | 1,77±0,77 | 0,100 |
| Omega-6 (g/day) | 22,89±8,56 | 20,68±7,90 | 0,183 |
| Fiber (g/day) | 12,64±5,99 | 14,15±4,04 | 0,482 |
| Diet fiber (g/day) | 29,83±8,70 | 26,32±10,04 | **0,047*** |
| Intermeal time (hours) | 3,59±1,26 | 4,13±2,12 | 0,099 |
| DED (solid foods, kcal/g) | 2,21±0,39 | 3,35±0,21 | **0,044*** |
| DED  (Solid + beverages, kcal/g) | 2,11±0,32 | 2,18±0,39 | 0,373 |
| * Significant at p<0,05; DED: Dietary energy density; SFA: Saturated Fatty Acids; MFA: Monounsaturated Fatty Acids; PFA: Polyunsaturated Fatty Acids | | | |

**Table 3. Association of glycemic control markers with biochemical data, anthropometric measurements, and lifestyle factors of participants**

| **Variable** | | **Patient Group**  **(n=44)** | | | | | | **Control Group**  **(n=44)** | | | | | |
| --- | --- | --- | --- | --- | --- | --- | --- | --- | --- | --- | --- | --- | --- |
| **FPG** | **Insulin** | **HOMA-IR** | **C-peptide** | **HbA1c** | **1,5 AG** | **FPG** | **Insulin** | **HOMA-IR** | **C-peptide** | **HbA1c** | **1,5 AG** |
| Age (years) (+SS) | **r**  **p** | 0,074  0,633 | -0,038  0,805 | -0,021  0,791 | 0,078  0,614 | 0,046  0,769 | 0,241  0,115 | 0,140  0,363 | 0,205  0,181 | 0,224  0,144 | 0,188  0,220 | 0,241  0,116 | -0,258  0,090 |
| BMI (kg/m2) | **r**  **p** | 0,107  0,488 | 0,407  **0,006*** | 0,450  **0,002*** | 0,185  0,230 | 0,167  0,278 | -0,003  0,985 | 0,370  **0,013*** | 0,529  **0,000*** | 0,561  **0,000*** | 0,466  **0,001*** | 0,155  0,316 | -0,269  0,078 |
| Waist Circumference (cm) | **r**  **p** | 0,080  0,606 | 0,369  **0,016*** | 0,402  **0,007*** | 0,223  0,146 | 0,218  0,155 | -0,127  0,411 | 0,234  0,126 | 0,395  **0,008*** | 0,404  **0,007*** | 0,498  **0,001*** | 0,277  0,069 | -0,412  **0,005*** |
| Waist-to-Height Ratio | **r**  **p** | 0,155  0,317 | 0,266  0,081 | 0,321  **0,034*** | 0,148  0,337 | 0,277  0,069 | -0,153  0,323 | 0,267  0,079 | 0,342  **0,023*** | 0,364  **0,015*** | 0,491  **0,001*** | 0,381  **0,011*** | -0,476  **0,001*** |
| TC (mg/dL) | **r**  **p** | -0,027  0,863 | -0,206  0,180 | -0,195  0,205 | -0,145  0,347 | 0,036  0,817 | 0,048  0,759 | -0,174  0,260 | 0,111  0,475 | 0,084  0,588 | 0,343  **0,023** | 0,180  0,243 | -0,298  **0,049*** |
| HDL-C (mg/dL) | **r**  **p** | -0,157  0,310 | -0,324  **0,032*** | -0,363  **0,015*** | -0,271  0,075 | -0,213  0,166 | 0,223  0,147 | -0,202  0,189 | -0,400  **0,007*** | -0,390  **0,009*** | -0,165  0,284 | 0,139  0,369 | -0,120  0,438 |
| LDL-C(mg/dL) | **r**  **p** | -0,123  0,425 | -0,199  0,195 | -0,211  0,169 | -0,182  0,236 | -0,020  0,896 | 0,114  0,462 | -0,229  0,135 | 0,249  0,103 | 0,165  0,285 | 0,087  0,574 | -0,265  0,082 | 0,140  0,364 |
| Trigliserid (mg/dL) | **r**  **p** | 0,140  0,365 | 0,085  0,584 | 0,156  0,313 | 0,042  0,785 | 0,140  0,365 | -0,048  0,757 | -0,157  0,310 | 0,412  **0,006*** | 0,335  **0,026*** | 0,566  **0,000*** | 0,091  0,558 | -0,147  0,340 |
| Energy Expenditure from Physical Activity | **r**  **p** | 0,136  0,378 | 0,120  0,438 | 0,169  0,272 | 0,156  0,313 | 0,134  0,386 | -0,183  0,236 | 0,086  0,579 | -0,286  0,060 | -0,230  0,132 | -0,455  **0,002*** | -0,182  0,236 | 0,024  0,875 |
| Physical Activity Level (PAL) | **r**  **p** | 0,238  0,120 | 0,017  0,914 | 0,058  0,709 | 0,040  0,796 | 0,234  0,127 | -0,228  0,137 | 0,003  0,985 | -0,251  0,100 | -0,222  0,148 | -0,355  **0,018*** | -0,164  0,288 | 0,019  0,902 |
| RMR | **r**  **p** | 0,055  0,724 | 0,157  0,307 | 0,199  0,196 | 0,174  0,258 | 0,045  0,771 | -0,107  0,489 | 0,240  0,116 | 0,377  **0,012*** | 0,370  **0,013*** | 0,108  0,485 | -0,025  0,872 | -0,031  0,843 |
| Sleep Duration (hours) | **r**  **p** | 0,102  0,512 | 0,103  0,508 | 0,130  0,401 | 0,050  0,749 | 0,035  0,820 | 0,197  0,200 | 0,232  0,129 | 0,154  0,318 | 0,169  0,273 | 0,203  0,186 | 0,174  0,259 | -0,099  0,552 |
| Total Stress Score | **r**  **p** | -0,067  0,667 | 0,065  0,675 | 0,040  0,796 | -0,196  0,201 | -0,087  0,576 | -0,151  0,329 | 0,251  0,100 | 0,044  0,777 | 0,078  0,613 | 0,126  0,415 | 0,102  0,508 | -0,075  0,626 |
| Circadian Rhythm Score | **r**  **p** | 0,014  0,930 | 0,022  0,885 | 0,016  0,917 | 0,106  0,493 | -0,029  0,854 | -0,066  0,668 | 0,310  **0,041*** | 0,263  0,085 | 0,295  0,052 | 0,033  0,831 | -0,021  0,891 | 0,012  0,936 |
| * Significant at p<0,05; BMI: Body Mass Index; HbA1c: Glycated Hemoglobin; FPG: Fasting Plasma Glucose; 1,5 AG:1,5-Anhydroglucitol; HDL-C: High-Density Lipoprotein Cholesterol; LDL-C: Low-Density Lipoprotein Cholesterol; TC: Total Cholesterol; HOMA-IR: Homeostasis Model Assessment of Insulin Resistance; RMR: Resting Metabolic Rate | | | | | | | | | | | | | |

**Table 4. Correlation of** **participants nutrient intakes with glycemic control indicators**

| **Nutrients and DED** | | **Patient Group**  **(n=44)** | | | | | | **Control Group**  **(n=44)** | | | | |  |
| --- | --- | --- | --- | --- | --- | --- | --- | --- | --- | --- | --- | --- | --- |
| **FPG** | **Insulin** | **HOMA-IR** | **C-peptide** | **HbA1c** | **1,5 AG** | **FPG** | **Insulin** | **HOMA-IR** | **C-peptide** | **HbA1c** | **1,5 AG** |
| Intermeal time (hours) | **r**  **p** | -0,053  0,734 | -0,205  0,182 | -0,191  0,214 | -0,109  0,483 | 0,070  0,651 | -0,114  0,460 | -0,118  0,446 | -0,060  0,698 | -0,078  0,615 | 0,124  0,422 | 0,441  **0,003*** | -0,236  0,124 |
| DED (solid foods, kcal/g) | **r**  **p** | -0,174  0,258 | -0,189  0,220 | -0,235  0,125 | -0,156  0,312 | -0,056  0,718 | -0,152  0,326 | -0,155  0,315 | -0,106  0,493 | -0,104  0,503 | -0,005  0,976 | 0,069  0,655 | -0,071  0,645 |
| DED  (Solid + beverages, kcal/g) | **r**  **p** | -0,204  0,183 | -0,089  0,564 | -0,128  0,409 | -0,134  0,387 | -0,152  0,323 | -0,106  0,495 | -0,060  0,700 | 0,043  0,783 | 0,022  0,886 | 0,101  0,514 | -0,111  0,474 | 0,059  0,705 |
| Energy (kcal/day) | **r**  **p** | -0,207  0,177 | 0,097  0,531 | 0,097  0,531 | 0,118  0,445 | -0,060  0,701 | -0,019  0,902 | 0,300  **0,048*** | 0,299  **0,048*** | 0,347  **0,021*** | 0,336  **0,026*** | 0,050  0,748 | -0,166  0,281 |
| Protein (g/day) | **r**  **p** | 0,029  0,853 | -0,036  0,815 | -0,070  0,653 | -0,085  0,583 | -0,006  0,969 | -0,128  0,407 | 0,288  0,058 | 0,267  0,079 | 0,300  **0,048*** | 0,200  0,193 | -0,112  0,470 | 0,103  0,506 |
| Carbohydrate (g/day) | **r**  **p** | -0,267  0,080 | 0,021  0,890 | -0,049  0,753 | 0,012  0,936 | -0,140  0,366 | 0,086  0,579 | 0,231  0,132 | 0,255  0,095 | 0,305  **0,044*** | 0,223  0,146 | -0,006  0,970 | -0,105  0,496 |
| Fat (g/day) | **r**  **p** | -0,052  0,739 | 0,150  0,332 | 0,128  0,407 | 0,133  0,388 | 0,094  0,545 | -0,173  0,260 | 0,201  0,192 | 0,121  0,435 | 0,143  0,356 | 0,215  0,160 | 0,071  0,647 | -0,032  0,837 |
| SFA (g/day) (%) | **r**  **p** | 0,095  0,538 | 0,337  0,025* | 0,361  **0,016*** | 0,219  0,153 | 0,048  0,758 | -0,173  0,263 | -0,073  0,638 | -0,035  0,823 | -0,045  0,770 | 0,092  0,554 | 0,049  0,752 | 0,179  0,245 |
| MFA (%) | **r**  **p** | 0,122  0,430 | 0,165  0,184 | 0,167  0,268 | 0,204  0,184 | -0,023  0,881 | -0,034  0,825 | 0,000  1,000 | 0,305  **0,047*** | 0,300  **0,048*** | -0,075  0,627 | 0,185  0,230 | -0,021  0,893 |
| PFA (%) | **r**  **p** | 0,114  0,462 | -0,073  0,637 | -0,018  0,909 | 0,042  0,786 | 0,166  0,281 | -0,200  0,194 | -0,100  0,520 | 0,092  0,554 | 0,060  0,700 | -0,080  0,607 | -0,046  0,769 | 0,104  0,502 |
| Fiber (g/day) | **r**  **p** | 0,038  0,805 | 0,004  0,978 | 0,004  0,981 | -0,107  0,488 | 0,051  0,744 | -0,104  0,504 | 0,075  0,628 | 0,125  0,420 | 0,148  0,336 | 0,148  0,337 | 0,057  0,713 | 0,070  0,651 |
| Cholesterol (mg/day) | **r**  **p** | 0,078  0,613 | 0,004  0,978 | 0,004  0,981 | -0,107  0,488 | 0,046  0,765 | 0,004  0,980 | 0,374  **0,048*** | -0,074  0,632 | -0,007  0,964 | -0,081  0,600 | -0,020  0,895 | -0,088  0,570 |
| Omega-3 (g/day) | **r**  **p** | -0,048  0,757 | 0,118  0,446 | 0,116  0,453 | 0,047  0,761 | 0,023  0,880 | -0,077  0,618 | 0,013  0,934 | 0,175  0,256 | 0,164  0,288 | 0,155  0,314 | -0,313  **0,039*** | 0,300  **0,048*** |
| Omega-6 (g/day) | **r**  **p** | 0,079  0,611 | -0,174  0,258 | -0,211  0,169 | -0,115  0,459 | 0,180  0,242 | -0,225  0,142 | 0,080  0,604 | 0,173  0,262 | 0,173  0,260 | 0,087  0,573 | -0,016  0,915 | -0,044  0,774 |
| * Significant at p<0,05; HbA1c: Glycated Hemoglobin; 1,5 AG:1,5-Anhydroglucitol; HOMA-IR: Homeostasis Model Assessment of Insulin Resistance; DED: Dietary energy density; SFA: Saturated Fatty Acids; MFA: Monounsaturated Fatty Acids; PFA: Polyunsaturated Fatty Acids | | | | | | | | | | | | | |

**Table 5. Multiple linear regression model for the relationship between 1,5 Anhidroglusitol and some variables of diabetic patients**

|  | | **1,5 Anhidroglusitol** | | | | | |
| --- | --- | --- | --- | --- | --- | --- | --- |
| **Model** | ***B*** | ***SE*** | ***β*** | ***t*** | ***p*** | **Lower bound** | **Upper bound** |
| Constant | 18,168 | 2,891 |  | 6,283 | 0,000 | 12,309 | 24,027 |
| HbA1c | -1,481 | 0,380 | -0,648 | -3,893 | 0,000 | -2,252 | -0,710 |
| FBG | -0,006 | 0,008 | -0,121 | -0,715 | 0,479 | -0,022 | 0,010 |
| Sleep duratin (hour) | 0,005 | 0,002 | 0,255 | 2,280 | 0,028 | 0,001 | 0,009 |
| DASS score | -0,024 | 0,018 | -0,153 | -1,342 | 0,188 | -0,060 | 0,012 |
| MEQ score | -0,032 | 0,022 | -0,164 | -1,474 | 0,149 | -0,076 | 0,012 |
| DED | -1,704 | 0,661 | -0,294 | -2,579 | 0,014 | -3,043 | -0,365 |
|  |  | R2 = 0.615; p < 0.001 | | | | | |
| DASS, depression anxiety and stress scale; DED, diet energy density; FBG, fasting blood glucose; HbA1c: Glycated Hemoglobin; MEQ, morningness-eveningness questionnaire | | | | | | | |
